# Supplementary material
Source: PubMed Central journal article supplement (PMC2529015)
Supplement: M802381200_1.pdf [file M802381200_1.pdf]

Supplemental Figure 1. Validation of Nup88 silenced clones. Stable clones expressing pSM2-Nup88 and selected in puromycin media were analyzed for Nup88 protein expression after incubation under hypertonic stress. A representative western blot reveals that clones 3 and 6 demonstrate near complete silencing of Nup88 expression. These clones were selected for further experiments regarding Nup88 silencing. B) QPCR for TonEBP target genes (AR and Hsp70) showing an intermediate expression for both genes in a clone partially silenced for Nup88 expression (clone #4). In contrast, no changes were observed in mRNA levels from a non silenced clone (clone #5) and as compared to totally silenced clone (#3). C, D) Protein analysis for AR (C) and Hsp70 (D) in partially (#4) and non silenced (#5) clones demonstrating intermediate and no change in protein expression, respectively, and as compared to the totally silenced clone (#3) and the empty vector control.

Supplemental Figure 2A. Evaluation of the involvement of CRM1 in TonEBP trafficking in IMCD3 cells under isotonic conditions. IMCD3 cells transfected with the TonEBP-GFP construct were incubated in the presence and absence of 10 ug/ml LMB, a specific inhibitor of CRM1. In the absence of LMB, IMCD3 cells demonstrate substantial TonEBP localization in the cytosol. However, in the presence of the inhibitor LMB, TonEBP is localized mainly in the nucleus, suggesting CRM1 is involved in TonEBP export from the nucleus under isotonic conditions.

Supplemental Figure 2B. Evaluation of the involvement of CRM1 in TonEBP trafficking in IMCD3 cells under hypertonic conditions. The left column demonstrates under hypertonic stress and in the presence of Nup88 (empty vector control cells), TonEBP is localized in the nucleus. Comparatively, when Nup88 expression is silenced (pSM2-Nup88) and cells are incubated under hypertonic stress, TonEBP is found in the cytosol (middle column). However, in the presence of the inhibitor LMB, in cells silenced for Nup88, TonEBP is observed in the cytosol indicating that CRM1 (inactive in this setting) is not responsible for shuttling TonEBP out of the nucleus under hypertonic stress (right column).

Supplemental Table 1. Nucleotide sequence alignment of the N-terminus of TonEBP of human, mouse and IMCD3 cells.

Supplemental Table 2. Protein sequence alignment of the N-terminus of TonEBP of human, mouse and IMCD3 cells. Sequence cloned from IMCD3 cells (*top line*) shares the same N-Terminus sequence than human TonEBP (*middle lane*) including the same Auxiliary Export Domain (AED) and Nuclear Export Signal (NES) (depicted in bold and underlined and surrounded by dotted rectangle). Note that the three sequences share the same Nuclear Localization Signal (NLS) (depicted in bold and italic and surrounded by dotted rectangle).

Supplemental Table 3. Primers and accession number of mRNAs used for QPCR experiments.

**A**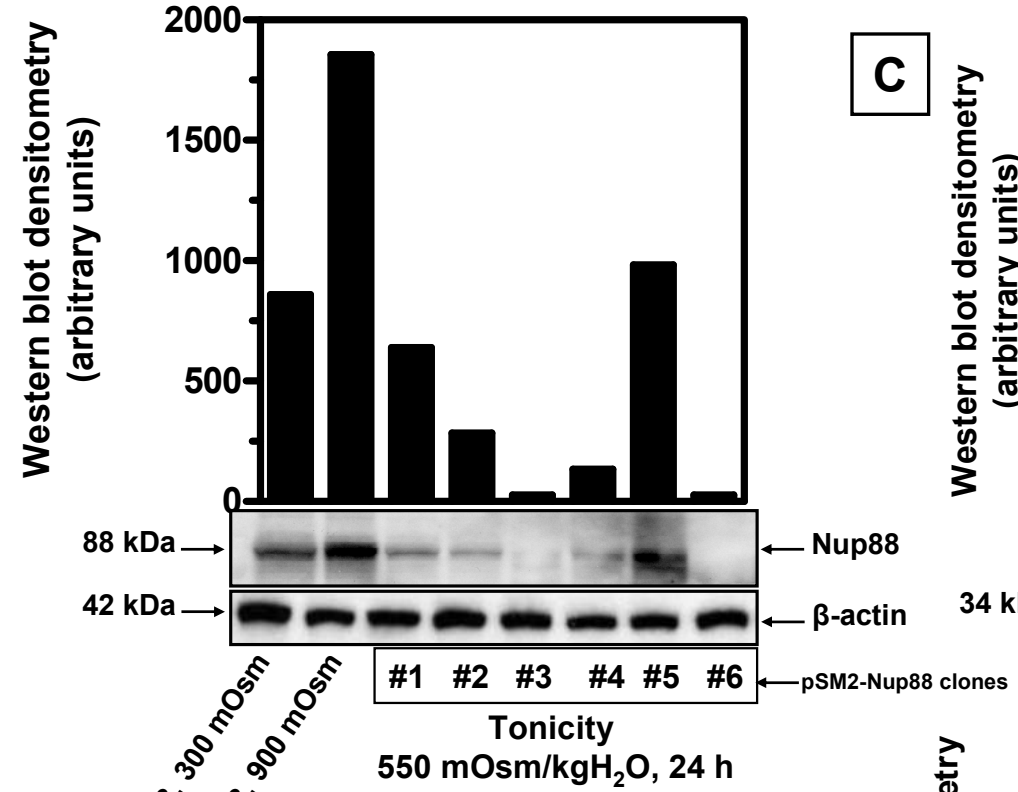**C**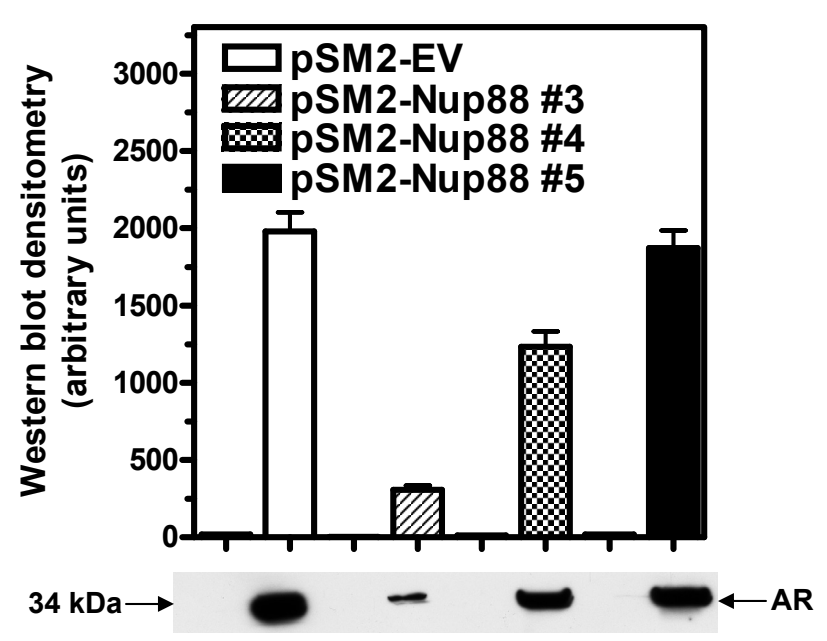**B**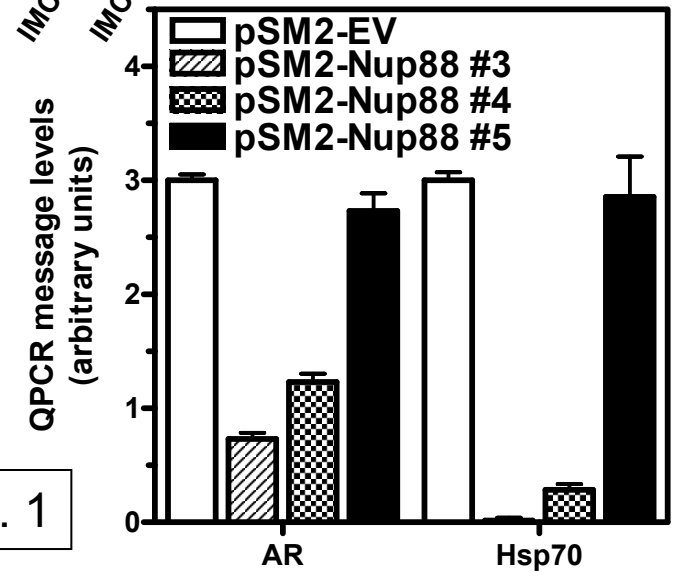**D**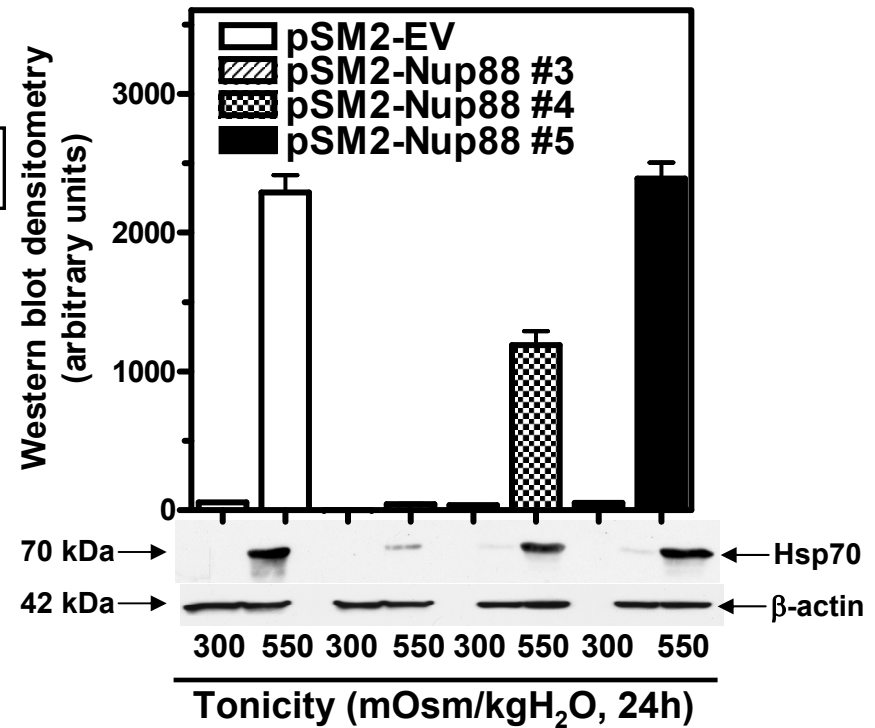

Sup Fig. 1

300 mOsm/kgH<sub>2</sub>O

Supplemental  
Figure 2A

-LMB

+LMB

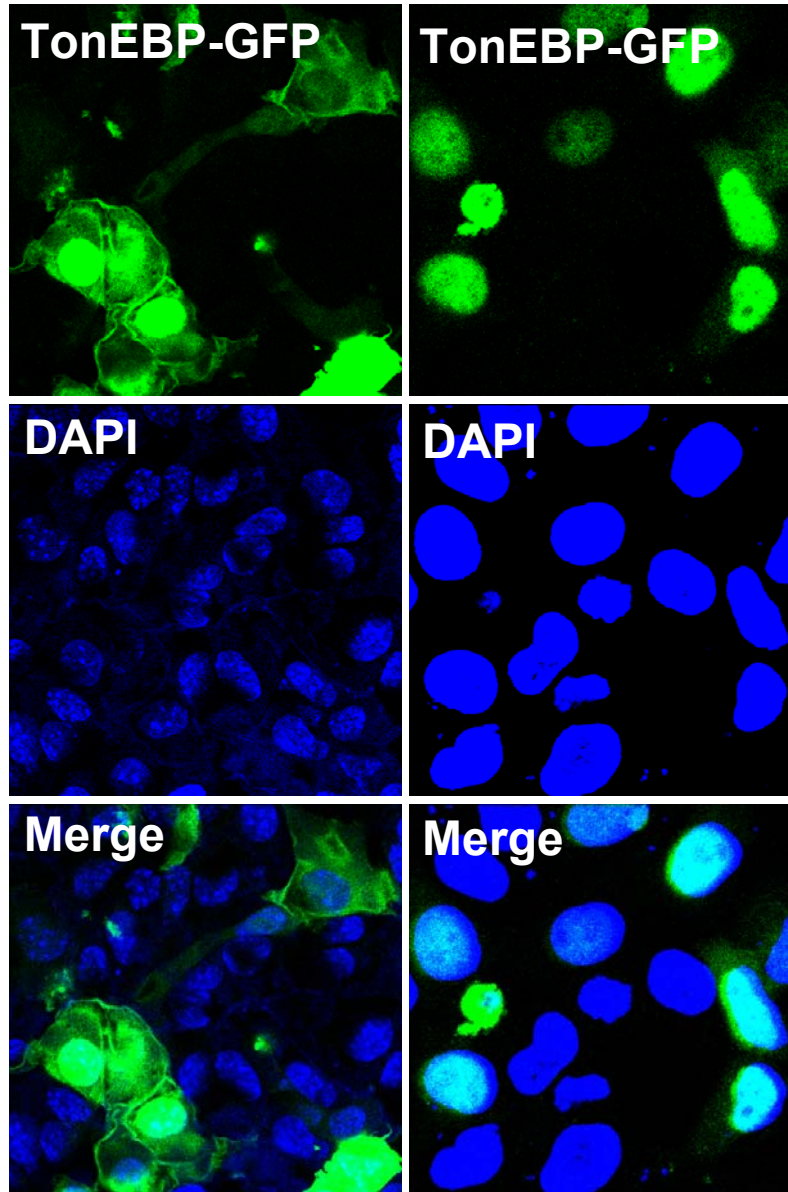

550 mOsm/kgH<sub>2</sub>O, 8 hrs

pSM2-Empty vector

pSM2-Nup88

Supplemental  
Figure 2B

-LMB

-LMB

+LMB

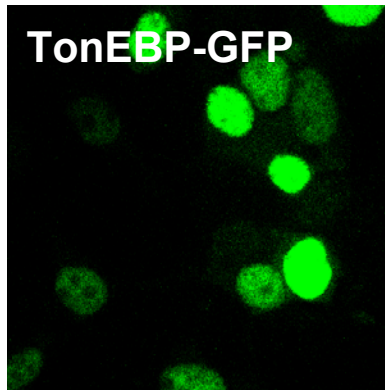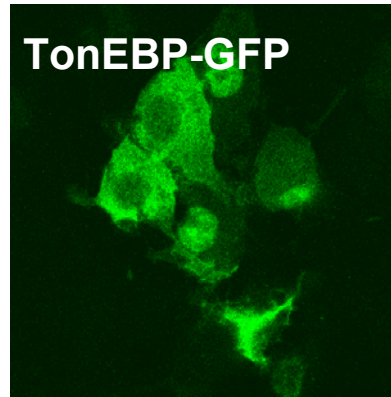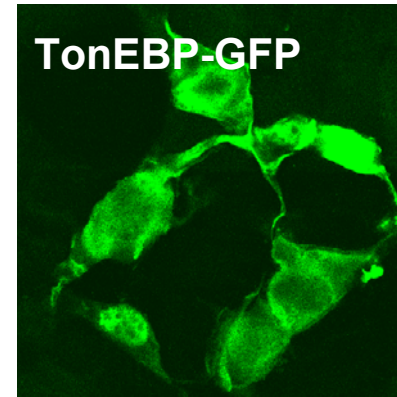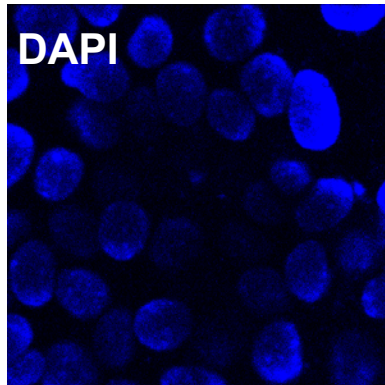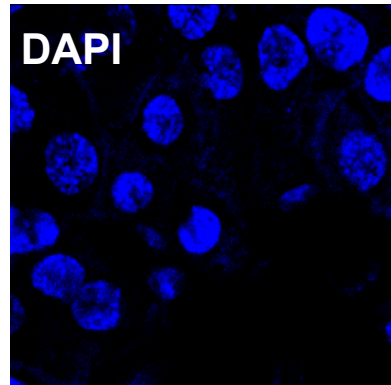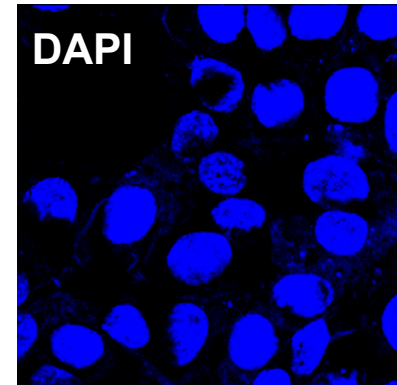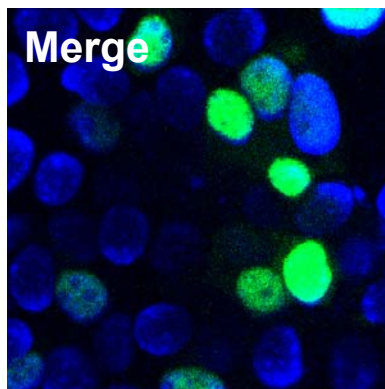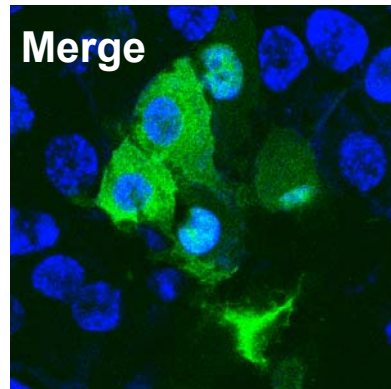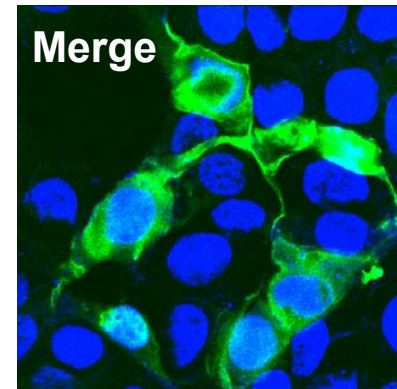

# Sup Table 1

|       |             |            |             |            |            |            |             |             |            |            |
|-------|-------------|------------|-------------|------------|------------|------------|-------------|-------------|------------|------------|
| HUMAN | ATGCCCTCGG  | ACTTCATCTC | ATTGCTCAGC  | GCGGACCTAG | ACCTGGAATC | GCCCAAGTCC | CTCTACTCGC  | GAGA        | .....      | .....      |
| MOUSE | .....       | .....      | .....       | .....      | .....      | .....      | .....       | .....       | .....      | .....      |
| IMCD  | ATGCCCTCGG  | ACTTCATCTC | ATTGCTCAGC  | GCGGACCTAG | ACCTGGAATC | GCCCAAGTCC | CTCTACTCGC  | GAGATTCTCT  | GAAGTTACAC |            |
| HUMAN | .....       | .....      | .....       | .....      | AT         | CTGTCTATGA | TCTTCTCCCA  | AAGGAGTTAC  | AGTTACCTCC | ATCTAGAGAA |
| MOUSE | .....       | .....      | .....       | .....      | .....      | .....      | .....       | .....       | .....      | .....      |
| IMCD  | CCATCACAGA  | CTTTTCATAG | AGCTGGACTA  | TTGGAAGAAT | CTGTCTATGA | TCTTCTCCCA | AAGGAGTTAC  | AGTTACCTCC  | ATCTAGAGAA |            |
| HUMAN | ACATCTGTAG  | CATCAATGAG | TCAGACAAGC  | GGTGGTGAGG | CAGGCTCGCC | TCCTCCAGCT | GTGGTTGCTG  | CTGATGCTTC  | TTCAGCTCCC |            |
| MOUSE | .....       | .....      | ATGAG       | TCAGACAAGC | GGTGGTGAGG | CAGGCTCGCC | TCCTCCAGCT  | GTAGTTGCTG  | CTGATGCTTC | TTCAGCTCCC |
| IMCD  | ACATCTGTAG  | CATCAATGAG | TCAGACAAGC  | GGTGGTGAGG | CAGGCTCGCC | TCCTCCAGCT | GTAGTTGCTG  | CTGATGCTTC  | TTCAGCTCCC |            |
| HUMAN | TCCTCTTCCT  | CCATGGGCGG | TGCTTGCCAGC | TCCTTTACCA | CCTCTTCCAG | CCCTACCATT | TATTCTACCT  | CAGTCACCGA  | CAGCAAGGCT |            |
| MOUSE | TCCTCTTCCT  | CCATGGGCGG | TGCTTGCCAGC | TCCTTTACCA | CCTCTTCCAG | CCCTACCATT | TATTCTACCT  | CAGTCACCGA  | CAGCAAGGCT |            |
| IMCD  | TCCTCTTCCT  | CCATGGGCGG | TGCTTGCCAGC | TCCTTTACCA | CCTCTTCCAG | CCCTACCATT | TATTCTACCT  | CAGTCACCGA  | CAGCAAGGCT |            |
| HUMAN | ATGC AAGTGG | AGAGCTGCTC | CTCAGCCGTG  | GGGTAAGTA  | ACAGAGGGGT | AAGTGAAAAG | CAGTTAACC   | GTAAACACAGT | TCAGCAGCAT |            |
| MOUSE | ATGC AAGTGG | AGAGCTGCTC | CTCAGCCGTG  | GGGTAAGTA  | ACAGAGGGGT | AAGTGAAAAG | CAGTTAACC   | GTAAACACAGT | TCAGCAGCAT |            |
| IMCD  | ATGC AAGTGG | AGAGCTGCTC | CTCAGCCGTG  | GGGTAAGTA  | ACAGAGGGGT | AAGTGAAAAG | CAGTTAACC   | GTAAACACAGT | TCAGCAGCAT |            |
| HUMAN | CCATCAAC    | CGAAGAGGCA | CACAGTTTG   | TACATCTCAC | CACCACCTGA | GGACTTGCTG | GATAACAGTC  | GGATGTCCTG  | CCAGGATGAG |            |
| MOUSE | CCATCAAC    | CGAAGAGGCA | CACAGTTTTG  | TACATCTCAC | CACCACCTGA | GGACTTGCTG | GATAACAGTC  | GGATGTCCTG  | CCAGGATGAG |            |
| IMCD  | CCATCAAC    | CGAAGAGGCA | CACAGTTTTG  | TACATCTCAC | CACCACCTGA | GGACTTGCTG | GATAACAGTC  | GGATGTCCTG  | CCAGGATGAG |            |
| HUMAN | GGGTGTGGAT  | TGGAATCTGA | GCAGAGCTGC  | AGTATGTGGA | TGGAGGATTG | CCCCTCCAAC | TTCAGTAAAC  | TGAGCACCAG  | TTCCTACAA  |            |
| MOUSE | GGGTGTGGAT  | TGGAATCTGA | GCAGAGCTGC  | AGTATGTGGA | TGGAGGATTG | CCCCTCCAAC | TTCAGTAAAC  | TGAGCACCAG  | TTCCTACAA  |            |
| IMCD  | GGGTGTGGAT  | TGGAATCTGA | GCAGAGCTGC  | AGTATGTGGA | TGGAGGATTG | CCCCTCCAAC | TTCAGTAAAC  | TGAGCACCAG  | TTCCTACAA  |            |
| HUMAN | GATAACACTG  | AGGTACCTCG | TAAATCACGA  | AAACGAAATC | CAAAGCAGAG | GCCGGGGGTG | AAACGACGAG  | ATTGTGAAGA  | ATCTAATATG |            |
| MOUSE | GATAACACTG  | AGGTACCTCG | TAAATCACGA  | AAACGAAATC | CAAAGCAGAG | GCCGGGGGTG | AAACGACGAG  | ATTGTGAAGA  | ATCTAATATG |            |
| IMCD  | GATAACACTG  | AGGTACCTCG | TAAATCACGA  | AAACGAAATC | CAAAGCAGAG | GCCGGGGGTG | AAACGACGAG  | ATTGTGAAGA  | ATCTAATATG |            |
| HUMAN | GATATATTTG  | ATGCCGACAG | TGCCAAAGCA  | CCTCACTATG | TGCTTTCTCA | GCTTACCACG | GACAAACAAAG | GCAACTCAA   | AGC        |            |
| MOUSE | GATATATTTG  | ATGCCGACAG | TGCCAAAGCA  | CCTCACTATG | TGCTTTCTCA | GCTTACCACG | GACAAACAAAG | GCAACTCAA   | AGC        |            |
| IMCD  | GATATATTTG  | ATGCCGACAG | TGCCAAAGCA  | CCTCACTATG | TGCTTTCTCA | GCTTACCACG | GACAAACAAAG | GCAACTCAA   | AGC        |            |

# Sup Table 2

|       | <u>NES</u> |            |            |            |            | <u>AED</u> |          |            |            |            |            |            |            |            |
|-------|------------|------------|------------|------------|------------|------------|----------|------------|------------|------------|------------|------------|------------|------------|
| IMCD3 | MPS        | FISLLS     | ADLDL      | SPKS       | LYSR       | SLKLH      | PSQTFHRA | GL         | LEESVYDLLP | KELQLPP    | PRE        | TSVASMSQTS | GGEAGSPPPA | VVAADASSAP |
| HUMAN | MPS        | FISLLS     | ADLDL      | SPKS       | LYSR       | .....      | .....    | .....      | SVYDLLP    | KELQLPP    | SRE        | TSVASMSQTS | GGEAGSPPPA | VVAADASSAP |
| MOUSE | .....      | .....      | .....      | .....      | .....      | .....      | .....    | .....      | .....      | .....      | .....      | MSQTS      | GGEAGSPPPA | VVAADASSAP |
| IMCD3 | SSSSMGGACS | SFTTSSSPTI | YSTSVTDSKA | MOVESCSSAV | GVSNRGVSEK | QLTGNTVQ   | QH       | PSTPKRHTVL | YISPPPEDLL | DNSRMSCQDE |            |            |            |            |
| HUMAN | SSSSMGGACS | SFTTSSSPTI | YSTSVTDSKA | MOVESCSSAV | GVSNRGVSEK | QLTGNTVQ   | QH       | PSTPKRHTVL | YISPPPEDLL | DNSRMSCQDE |            |            |            |            |
| MOUSE | SSSSMGGACS | SFTTSSSPTI | YSTSVTDSKA | MOVESCSSAV | GVSNRGVSEK | QLTGNTVQ   | QH       | PSTPKRHTVL | YISPPPEDLL | DNSRMSCQDE |            |            |            |            |
| IMCD3 | GCGLESEQSC | SMWMEDSPSN | FSNMSTSSYN | DNTEW      | PKSR       | KRNPKQ     | PGV      | KRRD       | CEESNM     | DIFDADSAKA | PHYVLSQLTT | DNKGNSK    |            |            |
| HUMAN | GCGLESEQSC | SMWMEDSPSN | FSNMSTSSYN | DNTEW      | PKSR       | KRNPKQ     | PGV      | KRRD       | CEESNM     | DIFDADSAKA | PHYVLSQLTT | DNKGNSK    |            |            |
| MOUSE | GCGLESEQSC | SMWMEDSPSN | FSNMSTSSYN | DNTEW      | PKSR       | KRNPKQ     | PGV      | KRRD       | CEESNM     | DIFDADSAKA | PHYVLSQLTT | DNKGNSK    |            |            |

NLS

Sup Table 3

|                                       | Accession number | Forward primer 5'→3'   | Reverse primer 5'→3'     |
|---------------------------------------|------------------|------------------------|--------------------------|
| Nucleoporin 88 (Nup88)                | NM_172394        | CCATTACTCTCAGTGCCTACC  | AGCCTTCAAGTTATGTTCAATTCC |
| Aldose Reductase (AR)                 | NM_009658        | CTATTTCCCCTGGATGCCTCAG | TTTCACCAAACCTTCATCCACTAG |
| Sodium-myoinositol transporter (SMIT) | NM_017391        | CCTACCGTGCTCCTGAGTGTG  | GTGGGAGGTGGTGTGAGAAGAC   |
| Betaine/GABA transporter (BGT1)       | NM_133661        | AAGGCAAGGACCAGGTGAAGG  | CACACTCCCCTGGCTGCTATAC   |
| Taurine transporter (TauT)            | NM_009320        | CGCATCCATCGTCATTGTGTC  | GTGTCCTCCATGCACTGTGG     |
| Heat shock protein 70 (Hsp70)         | NM_010479        | GGTCTAAACGTGCTGCGGATC  | AGTCCTCCCCTCCCAGGTG      |
| $\alpha_1$ -subunit Na/K-ATPase       | NM_144900        | GGATTGTTGGCTCTGATG     | CGGAATTGTTACTGGTTAGG     |
| $\beta$ -Actin                        | NM_007393        | CTCTCCCTCACGCCATCC     | GTAACAGTCCGCCTAGAAGC     |
